# Supplementary material for: Phytochemical Profiling of Extracts from Rare Potentilla Species and Evaluation of Their Anticancer Potential
Source: MDPI journal article supplement (doi:10.3390/ijms24054836), 2023-03-02
Supplement: s1 [file s1]

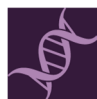

Supplementary Material

## Phytochemical Profiling of Extracts from Rare *Potentilla* Species and Evaluation of Their Anticancer Potential

Daniel Augustynowicz <sup>1</sup>, Marta Kinga Lemieszek <sup>2</sup>, Jakub Władysław Strawa <sup>1</sup>, Adrian Wiater <sup>3</sup> and Michał Tomczyk <sup>1,\*</sup>

<sup>1</sup> Department of Pharmacognosy, Faculty of Pharmacy with the Division of Laboratory Medicine, Medical University of Białystok, ul. Mickiewicza 2a, 15-230 Białystok, Poland; daniel.augustynowicz@sd.umb.edu.pl (D.A.), jakub.strawa@umb.edu.pl (J.W.S.),

<sup>2</sup> Department of Medical Biology, Institute of Rural Health, ul. Jaczewskiego 2, 20-090 Lublin, Poland; lemieszek.marta@imw.lublin.pl (M.K.L.)

<sup>3</sup> Department of Industrial and Environmental Microbiology, Institute of Biological Sciences, Maria Curie-Skłodowska University, ul. Akademicka 19, 20-033 Lublin, Poland; adrian.wiater@mail.umcs.pl (A.W.)

\* Correspondence: michal.tomczyk@umb.edu.pl (M.T.), Tel.: 48-85-748-56-9

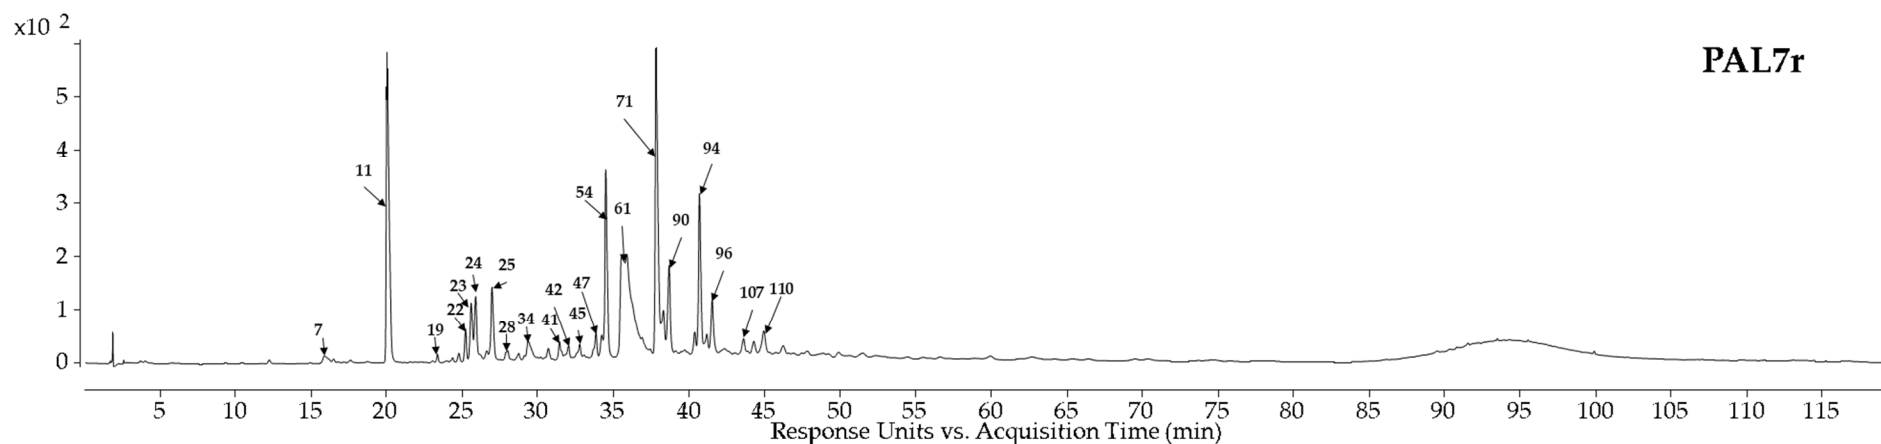

**Supplementary Figure S1.** The UV chromatogram with a designation of the main components of the analyzed **PAL7r** extract, recorded at length of 280 nm.

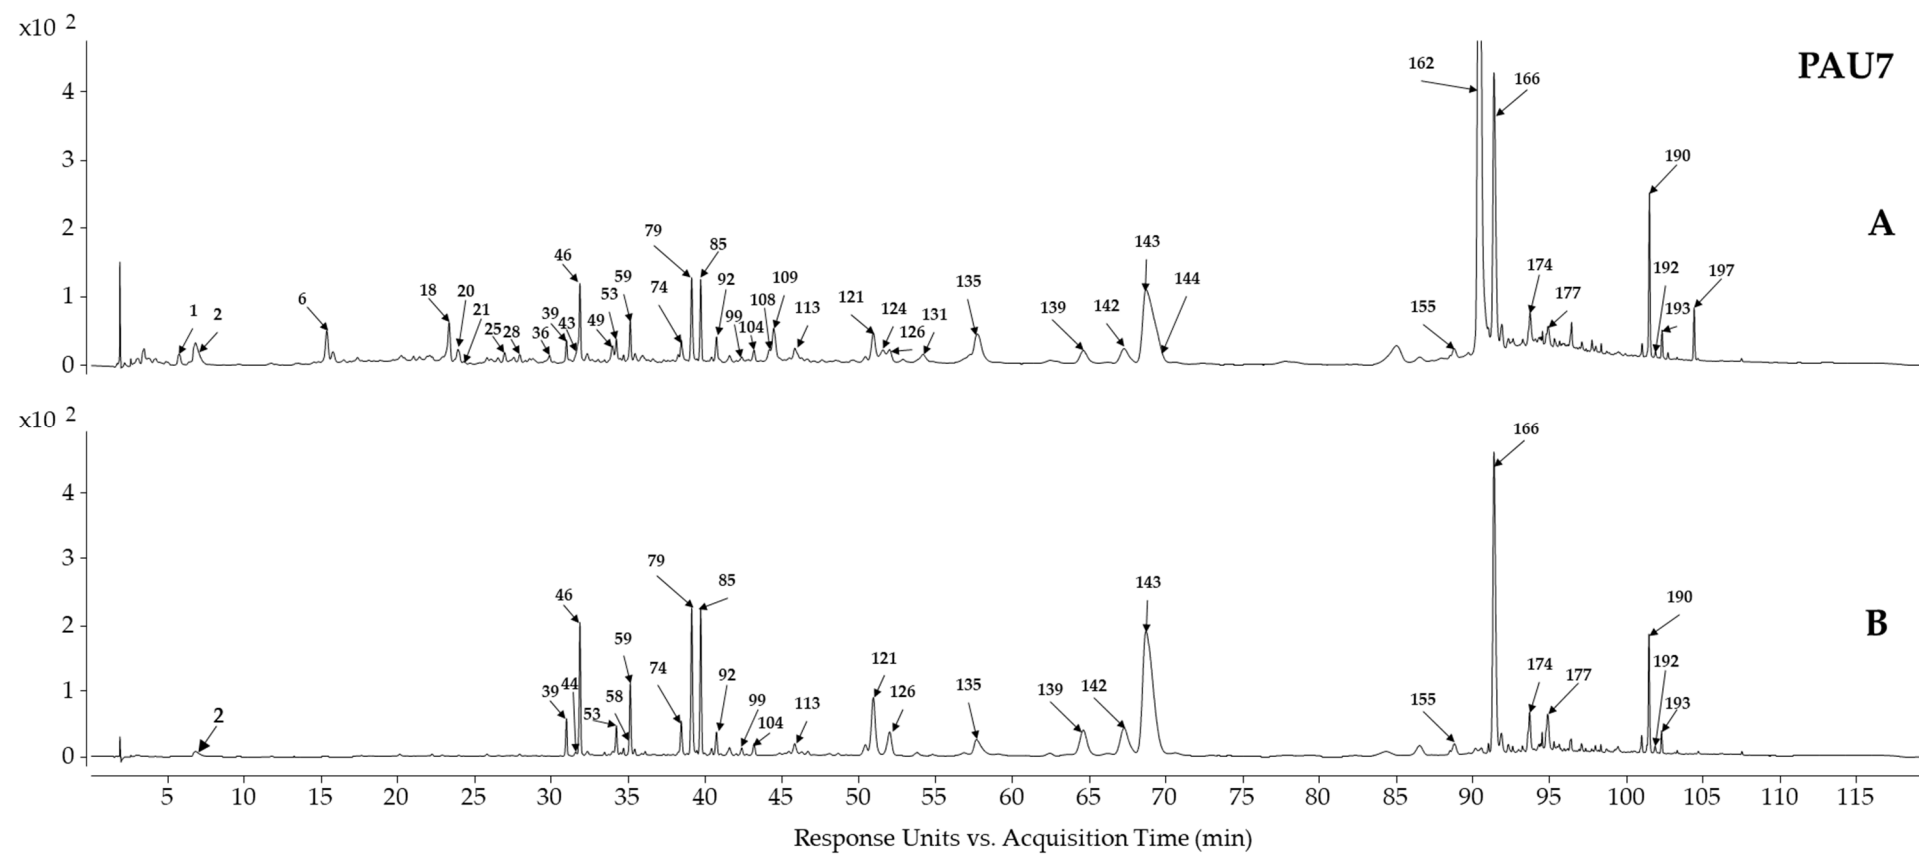

**Supplementary Figure S2.** The UV chromatograms with a designation of the main components of the analyzed **PAU7** extract, recorded at lengths of 280 nm (A) and 360 nm (B).

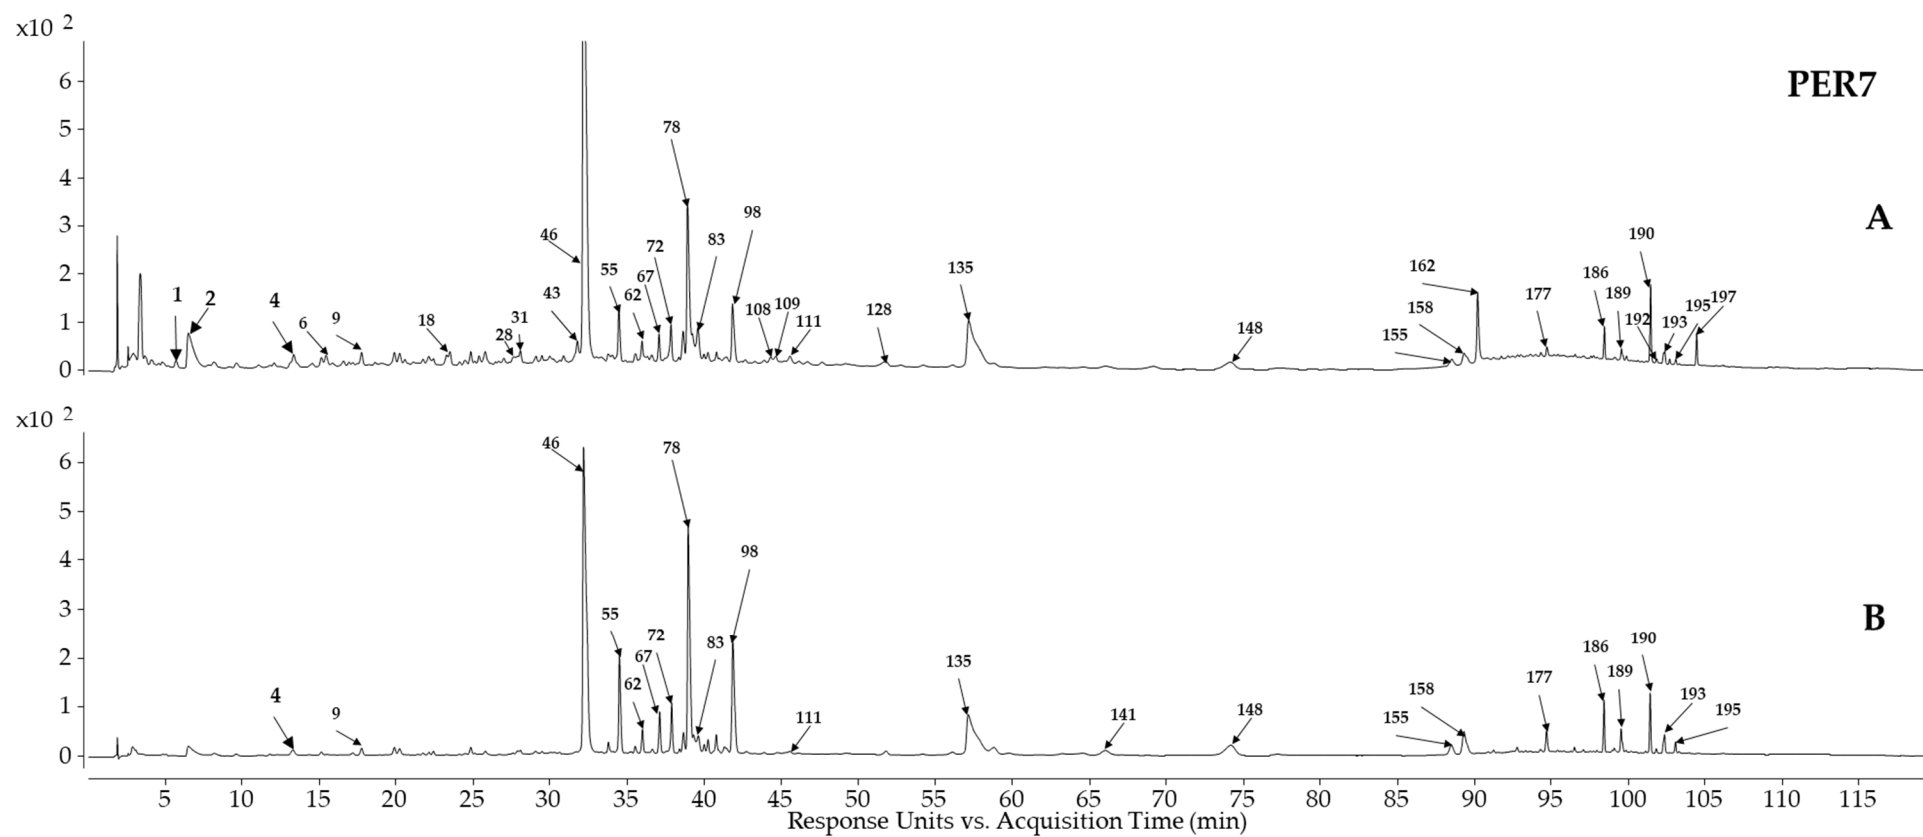

**Supplementary Figure S3.** The UV chromatograms with a designation of the main components of the analyzed **PER7** extract, recorded at lengths of 280 nm (A) and 360 nm (B).

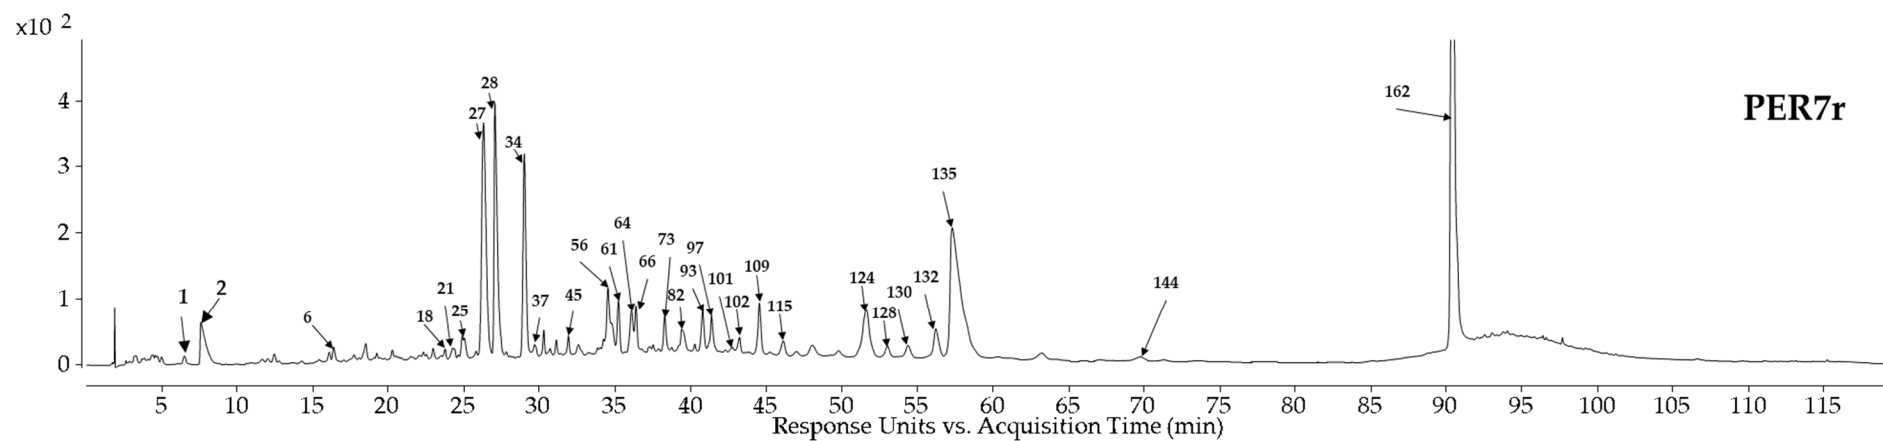

**Supplementary Figure S4.** The UV chromatogram with a designation of the main components of the analyzed **PER7r** extract, recorded at length of 280 nm.

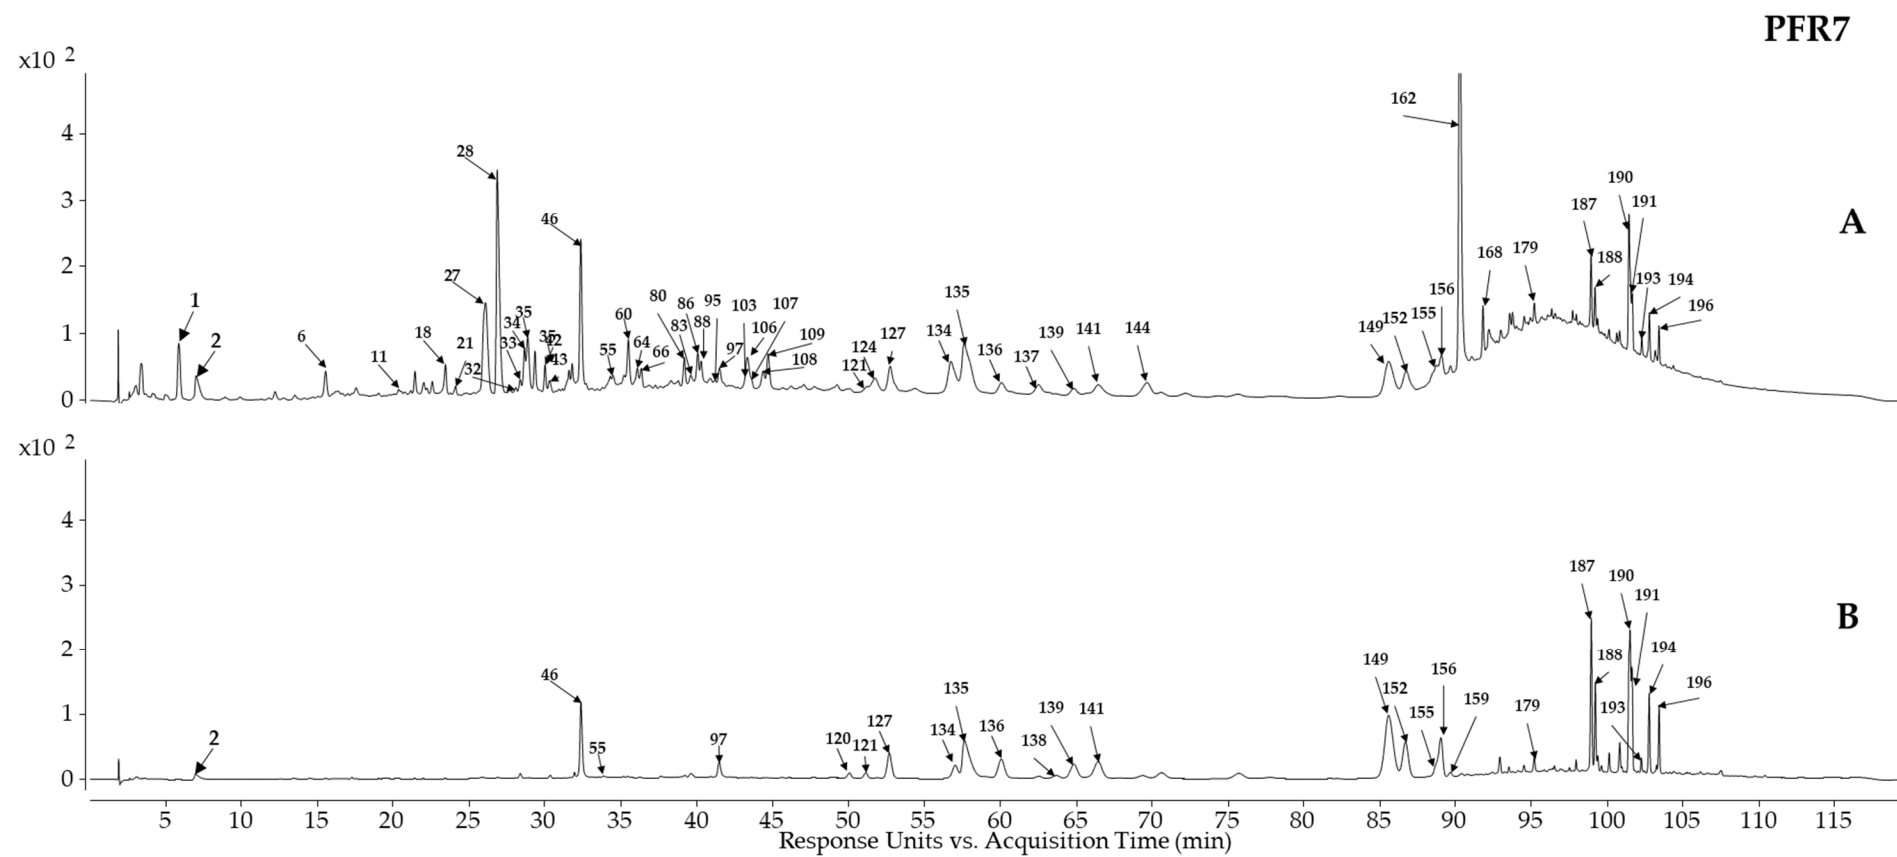

**Supplementary Figure S5.** The UV chromatograms with a designation of the main components of the analyzed **PFR7** extract, recorded at lengths of 280 nm (A) and 360 nm (B).

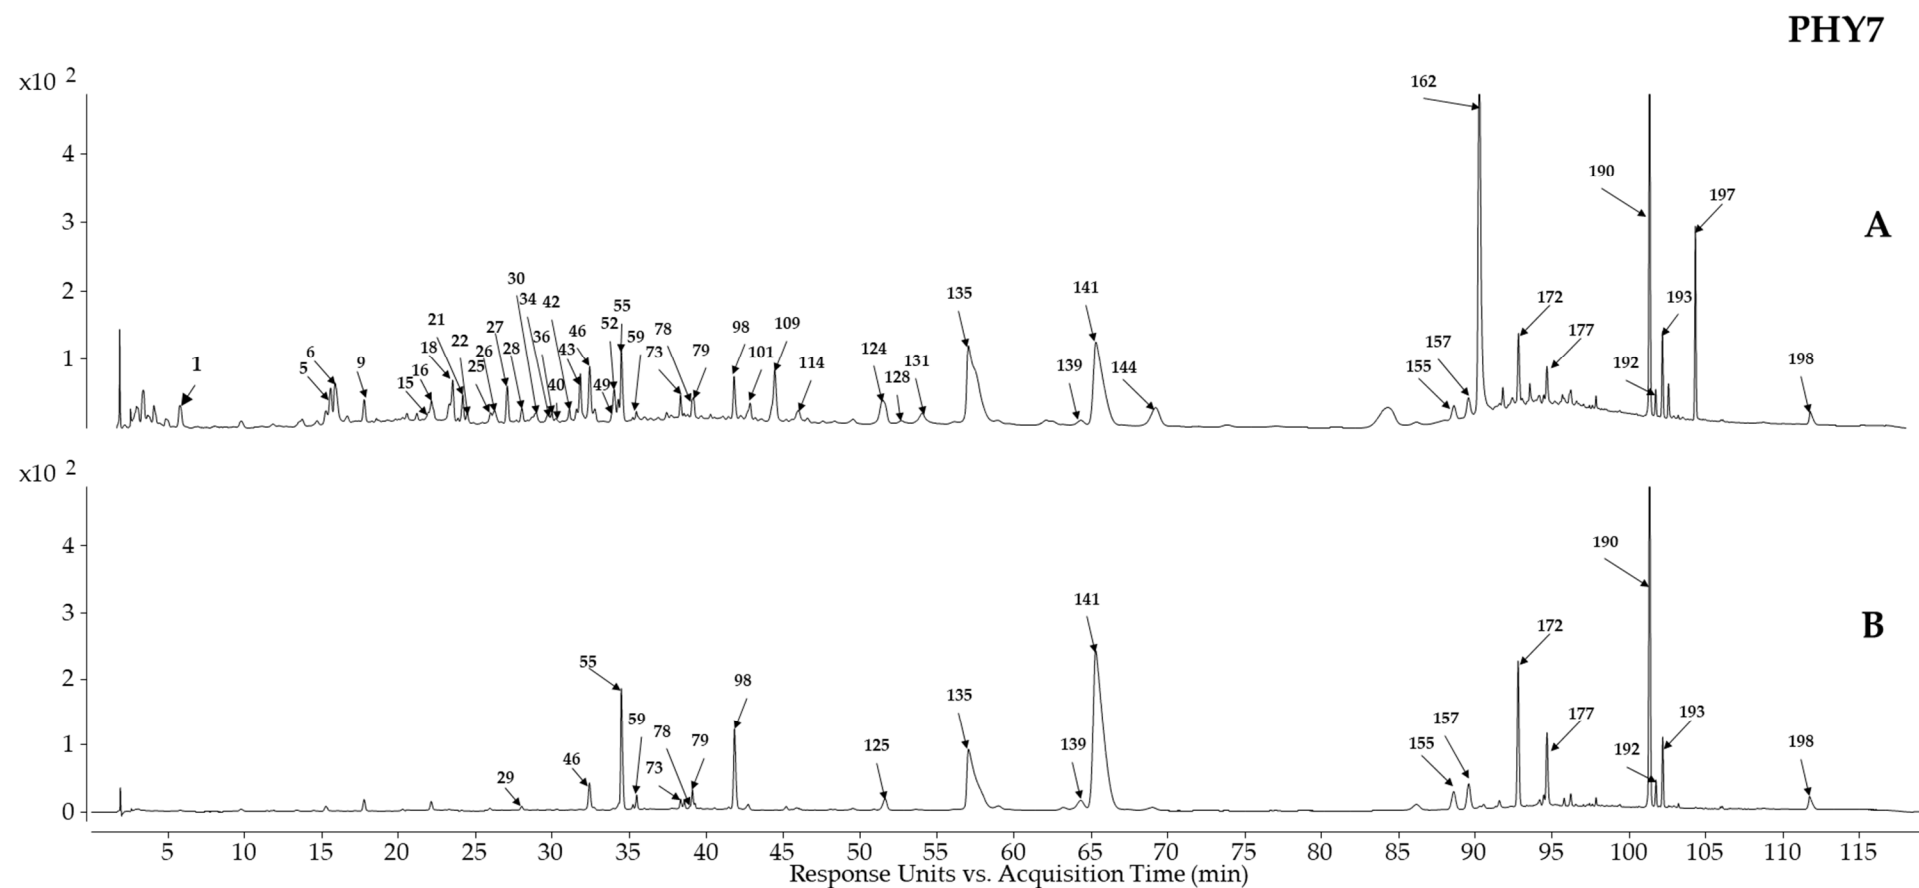

**Supplementary Figure S6.** The UV chromatograms with a designation of the main components of the analyzed **PHY7** extract, recorded at lengths of 280 nm (A) and 360 nm (B).

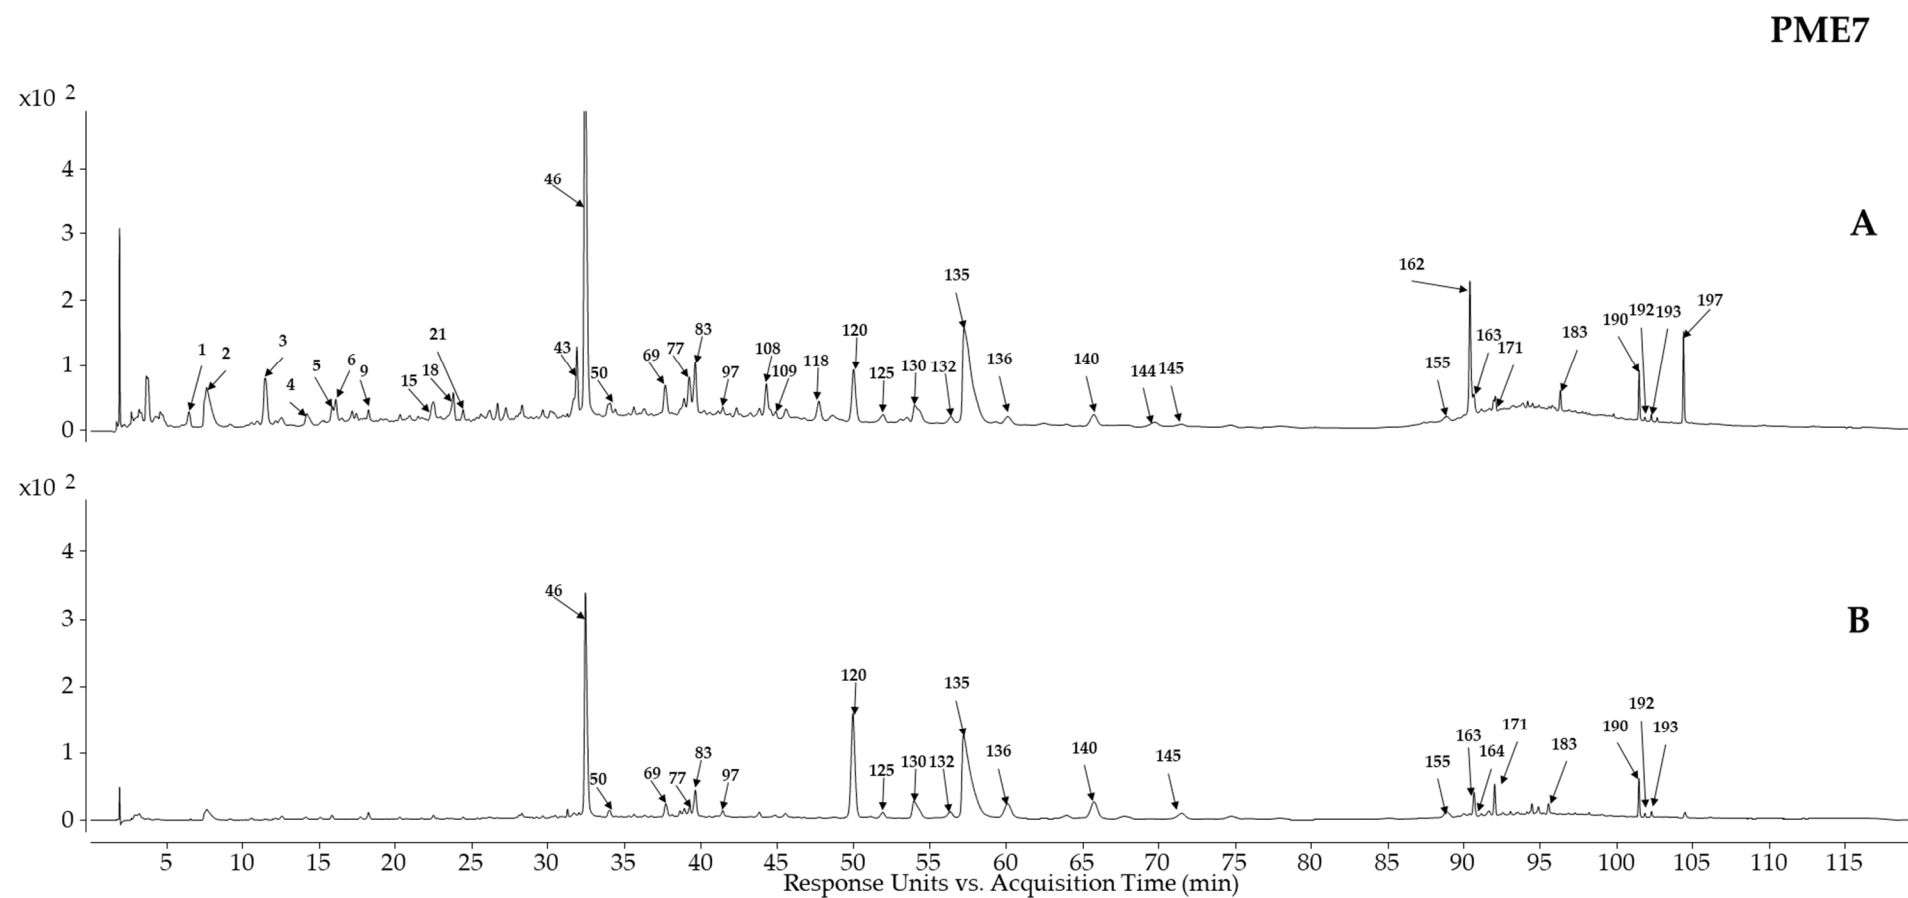

**Supplementary Figure S7.** The UV chromatograms with a designation of the main components of the analyzed **PME7** extract, recorded at lengths of 280 nm (A) and 360 nm (B).

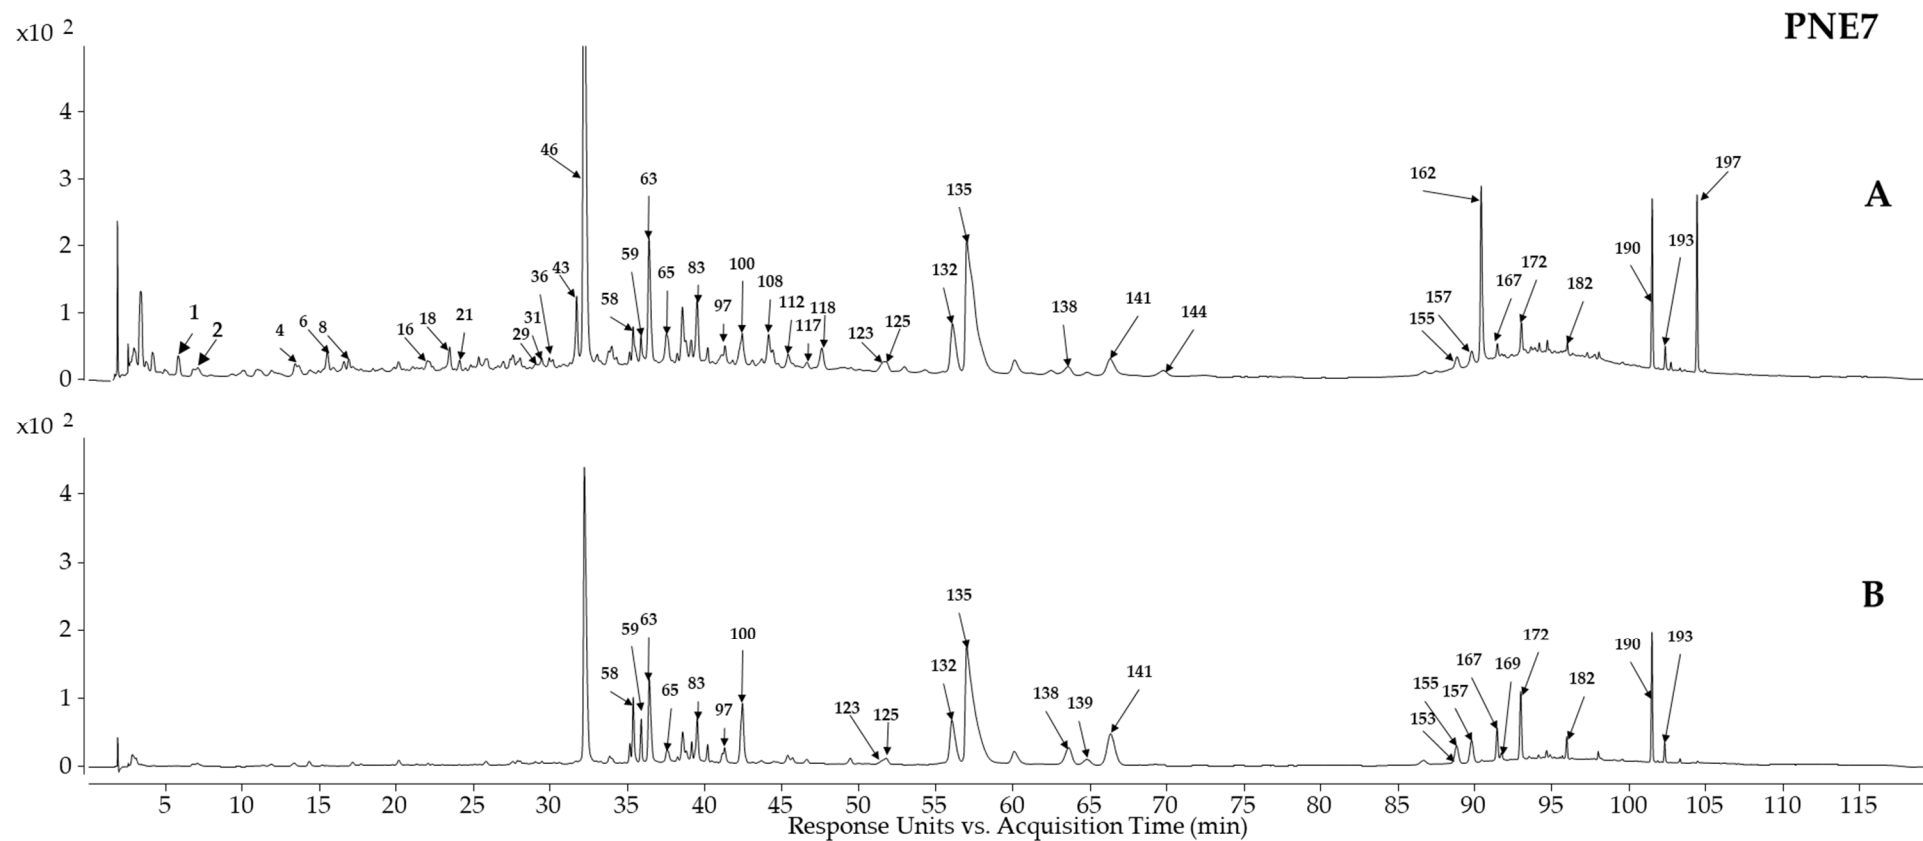

**Supplementary Figure S8.** The UV chromatograms with a designation of the main components of the analyzed **PNE7** extract, recorded at lengths of 280 nm (A) and 360 nm (B).



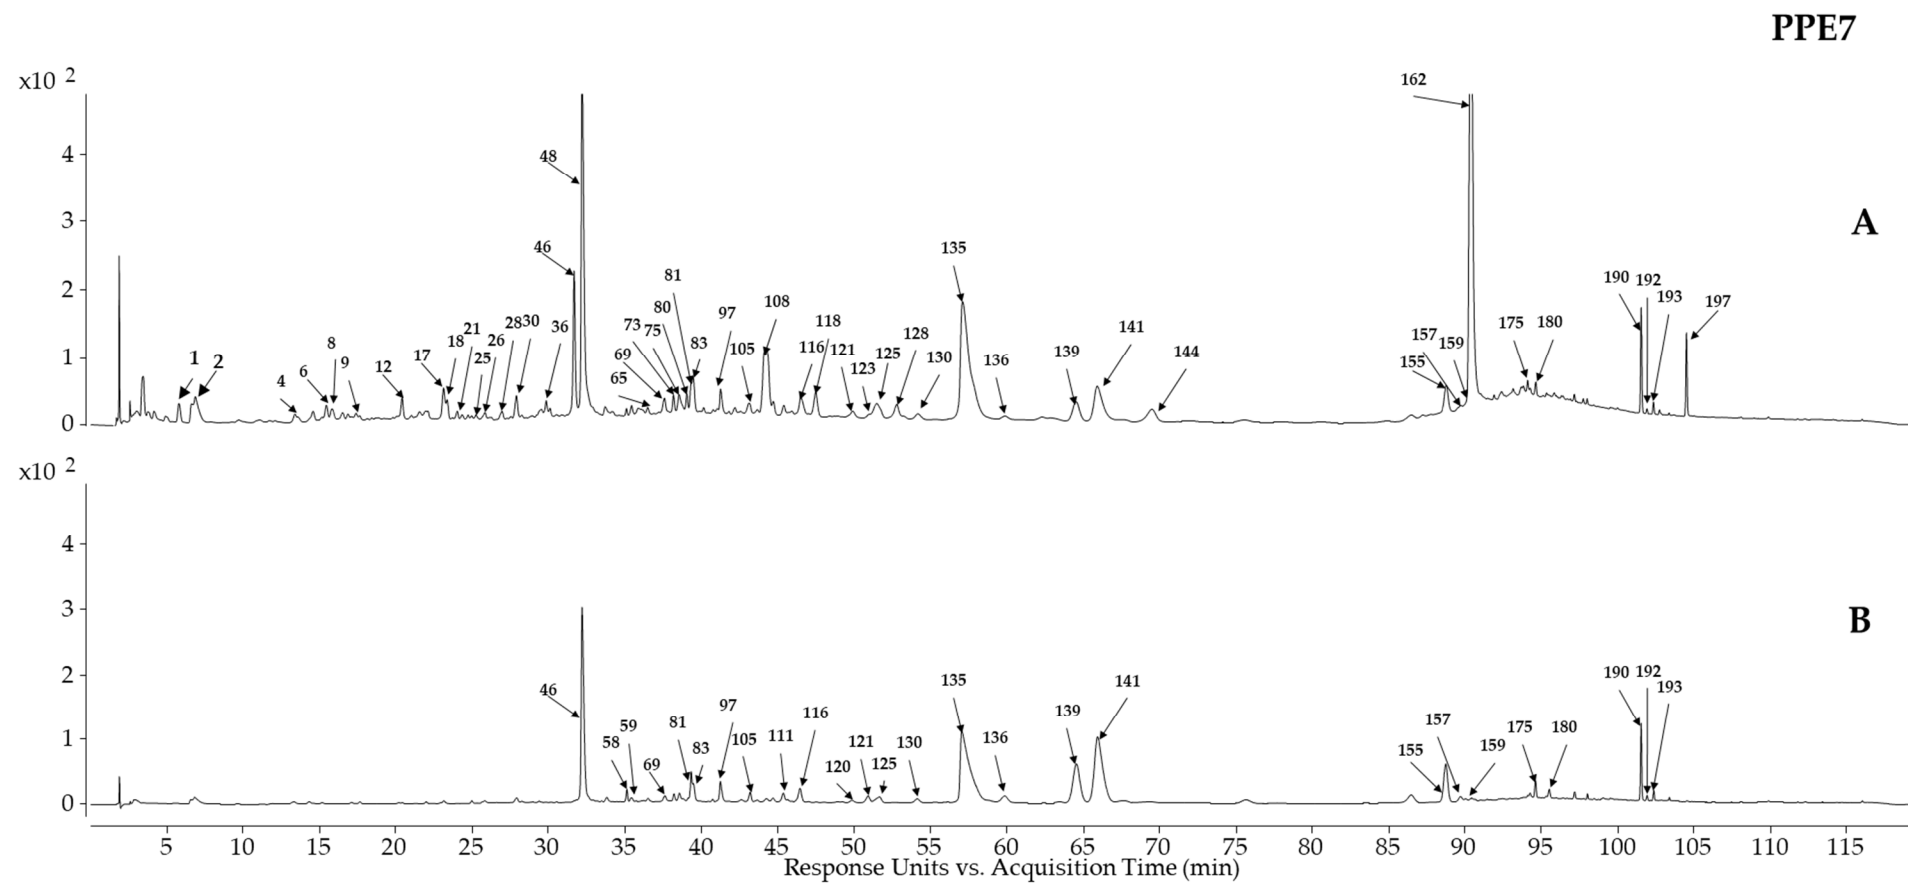

**Supplementary Figure S9.** The UV chromatograms with a designation of the main components of the analyzed **PPE7** extract, recorded at lengths of 280 nm (A) and 360 nm (B).

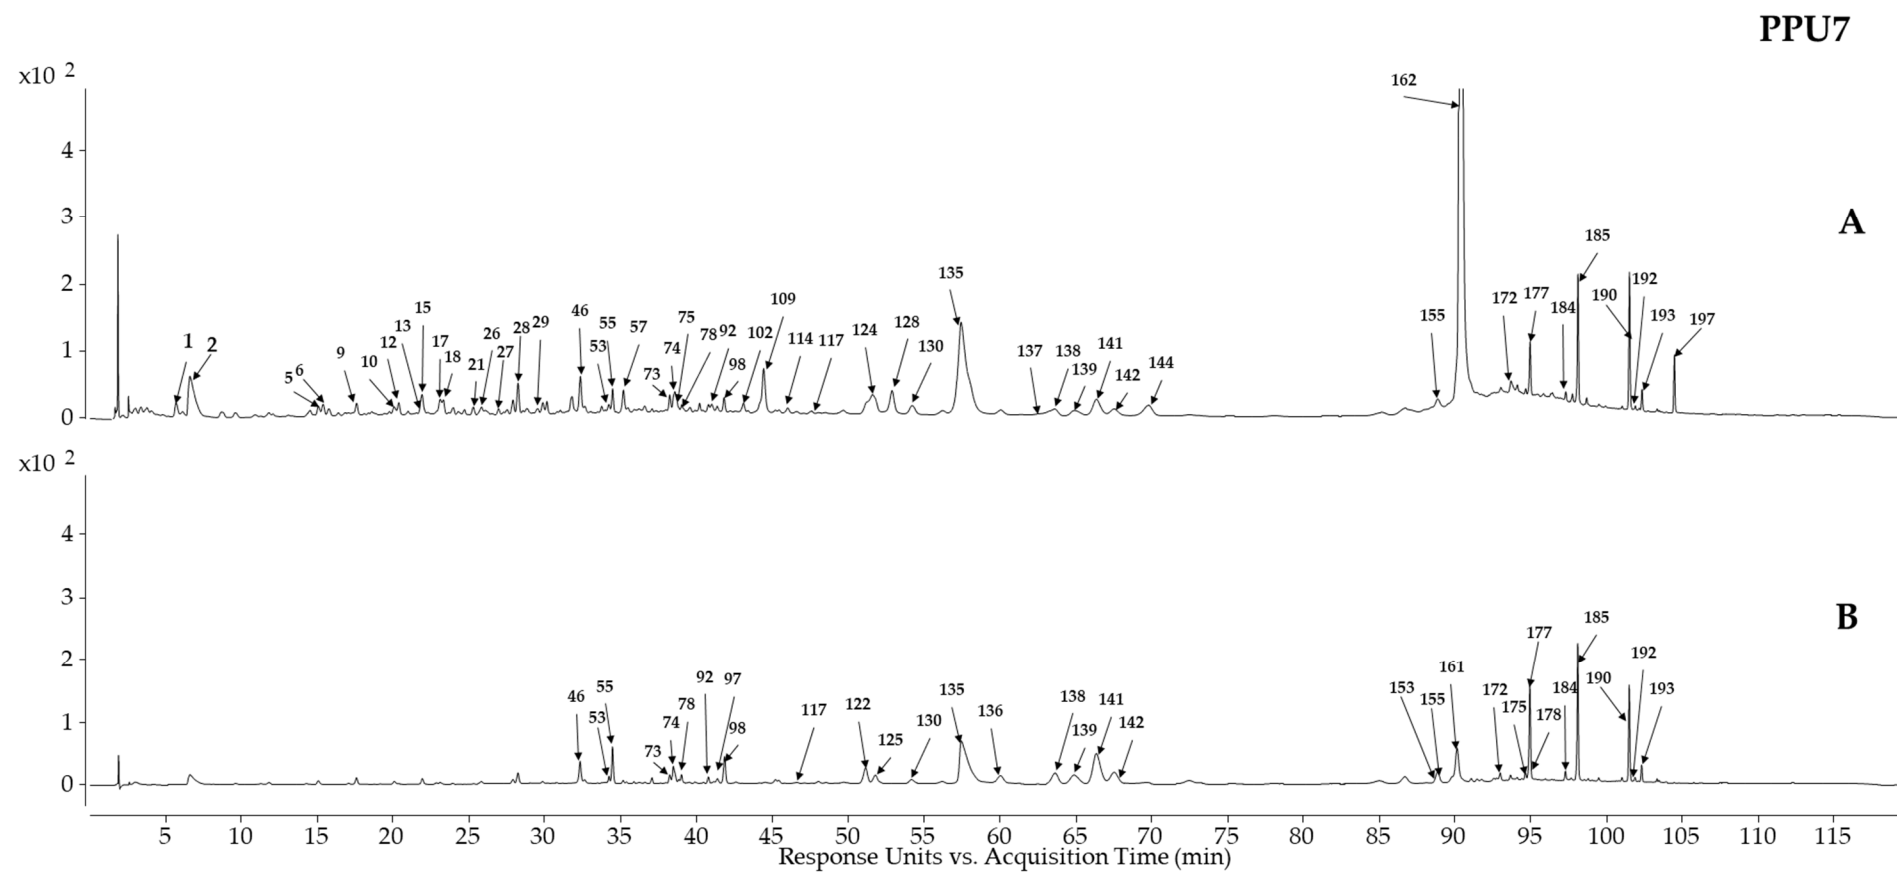

**Supplementary Figure S10.** The UV chromatograms with a designation of the main components of the analyzed **PPU7** extract, recorded at lengths of 280 nm (A) and 360 nm (B).

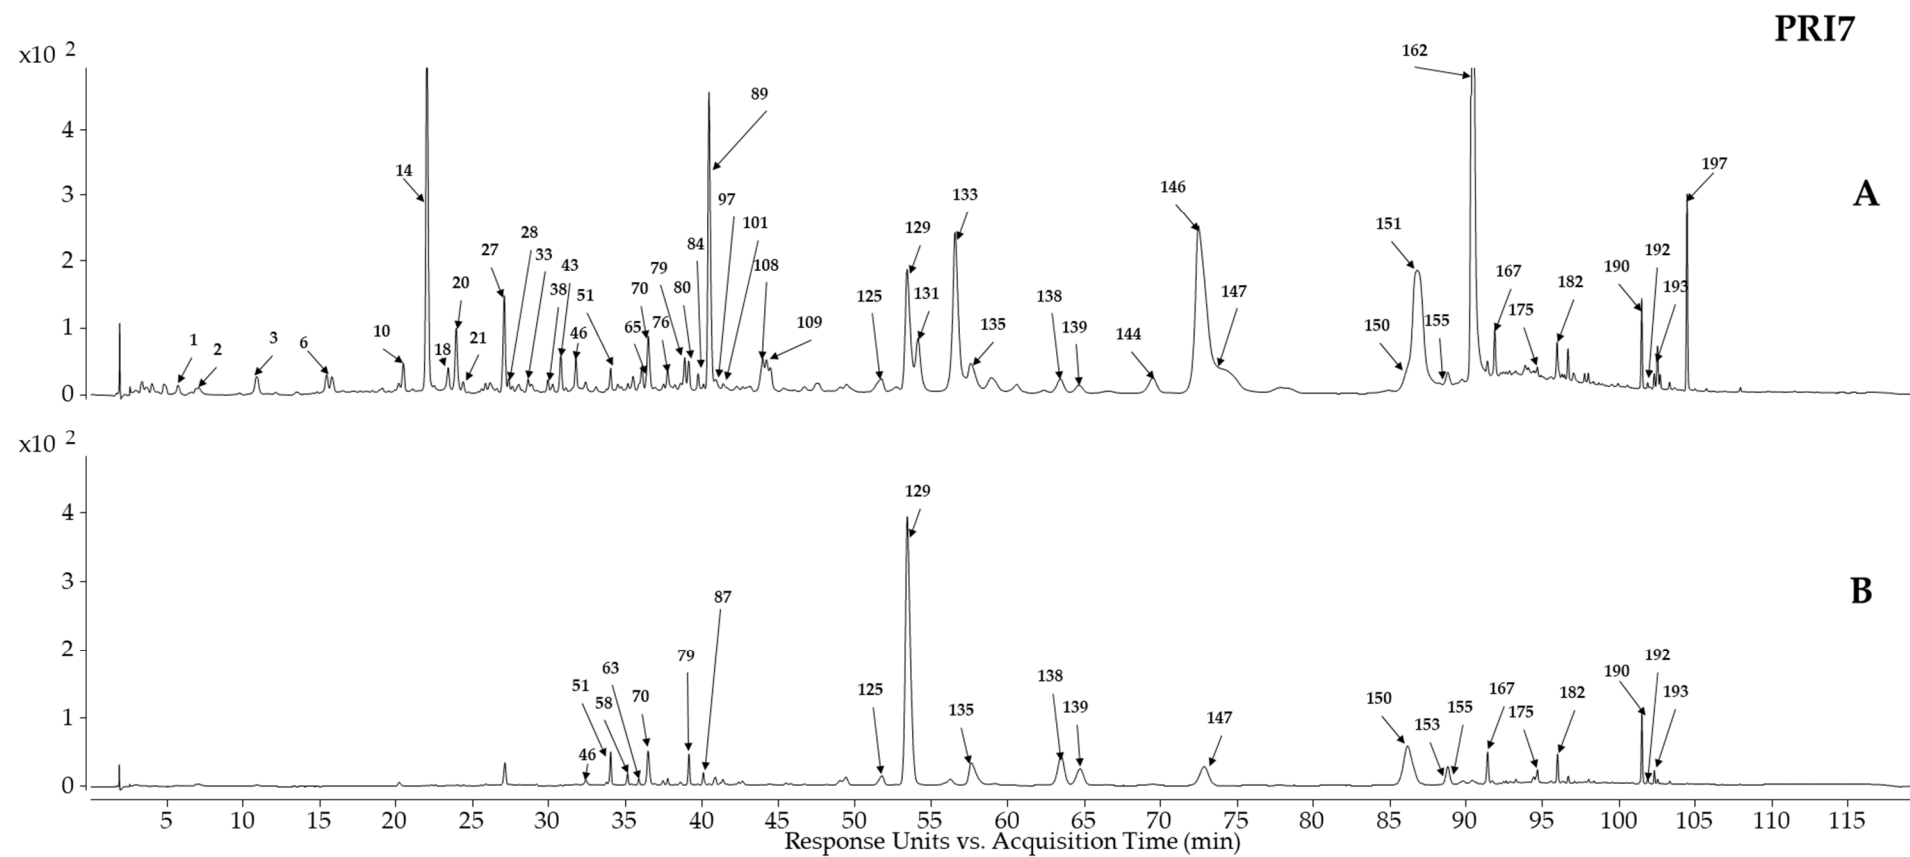

**Supplementary Figure S11.** The UV chromatograms with a designation of the main components of the analyzed **PRI7** extract, recorded at lengths of 280 nm (A) and 360 nm (B).

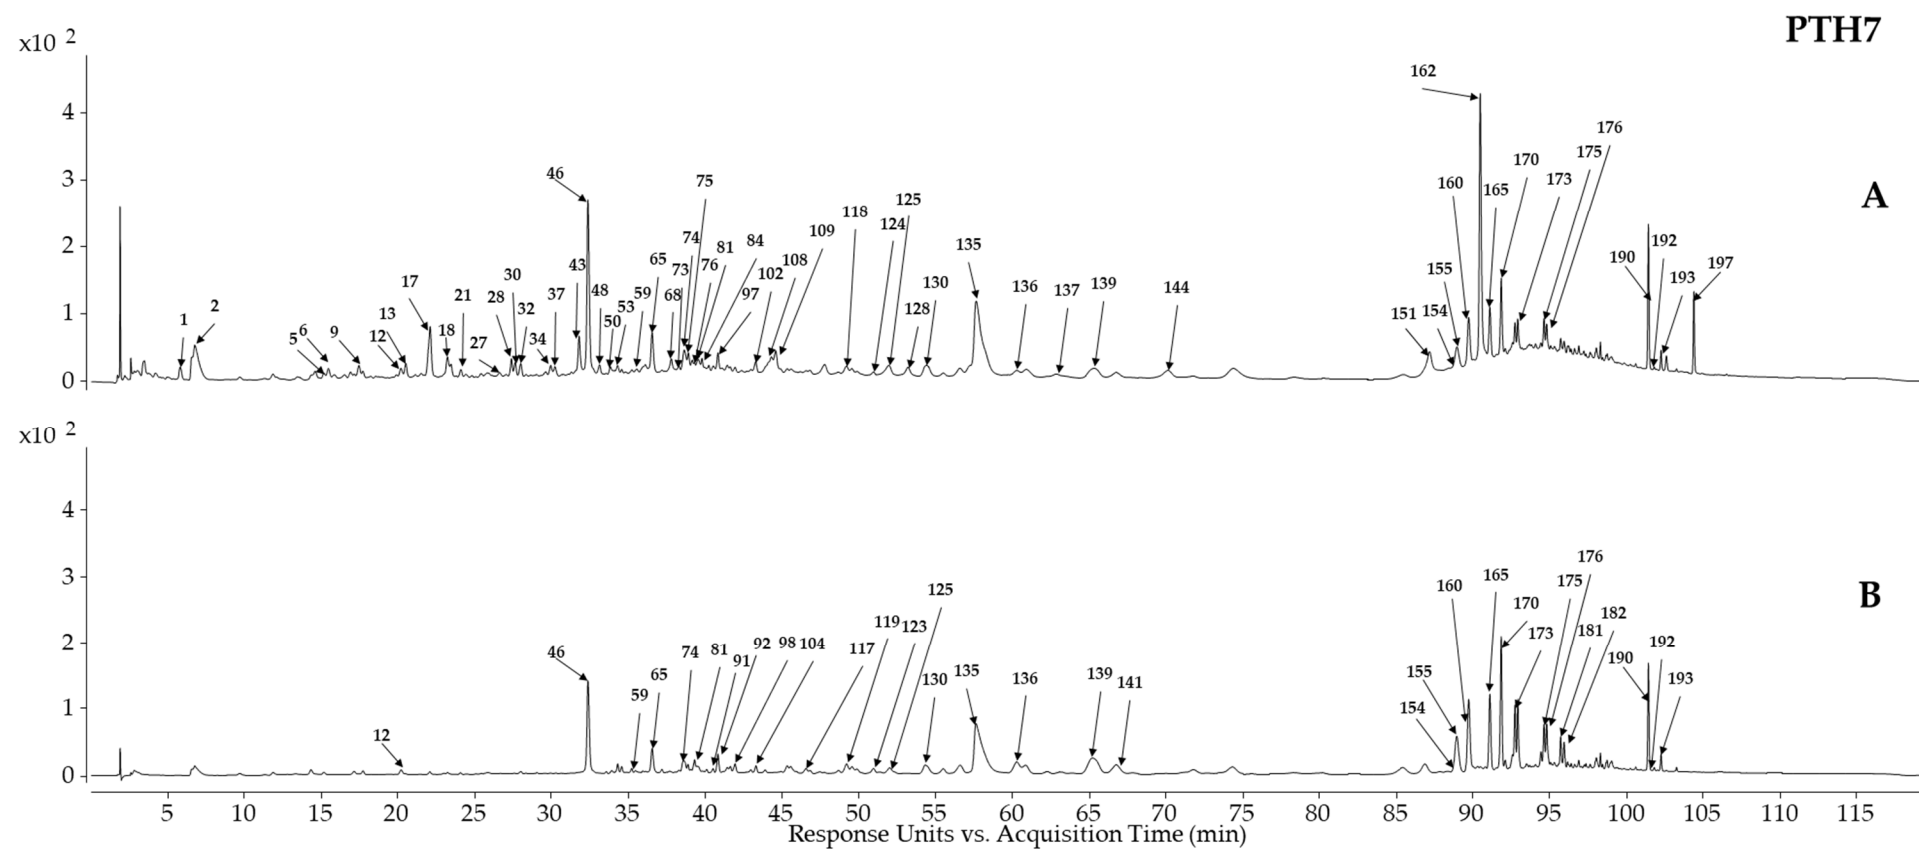

**Supplementary Figure S12.** The UV chromatograms with a designation of the main components of the analyzed **PTH7** extract, recorded at lengths of 280 nm (A) and 360 nm (B).
